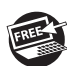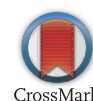

## Issues and Events

### Contact for information on ADA events:

American Diabetes Association  
1701 N. Beauregard St., Alexandria, VA 22311  
Tel: 800-232-3472, select option 1  
Fax: 703-549-1715 or 703-253-4358  
E-mail: [professionaleducation@diabetes.org](mailto:professionaleducation@diabetes.org)  
Web site: [professional.diabetes.org/ce](http://professional.diabetes.org/ce)

### ADA EVENTS

#### 2015 Diabetes Professional Educators Conference

13–14 March 2015  
Country Springs Hotel and Conference Center  
Pewaukee, Wisconsin  
Web site: [professional.diabetes.org/Wisconsin](http://professional.diabetes.org/Wisconsin)

#### Advanced Diabetes Practice for Primary Care

10 April 2015  
Denver, Colorado  
Web site: [professional.diabetes.org/Colorado](http://professional.diabetes.org/Colorado)

#### 30th Annual Clinical Conference on Diabetes

21–24 May 2015  
Rosen Shingle Creek  
Orlando, Florida  
Web site: [professional.diabetes.org/cc](http://professional.diabetes.org/cc)

#### 75th Scientific Sessions

5–9 June 2015  
Boston Convention and Exhibition Center  
Boston, Massachusetts  
Web site: [scientificsessions.diabetes.org](http://scientificsessions.diabetes.org)

#### 2015 Diabetes Is Primary

6 June 2015  
Boston, Massachusetts  
Web site: [professional.diabetes.org/primary](http://professional.diabetes.org/primary)

### ASSOCIATION-FUNDED RESEARCH DATABASE

The American Diabetes Association offers access to a searchable database with useful information on the Association-funded research grants. The database provides an easy way to learn more about the Association's Research Program and the critical and innovative biomedical research made possible through the generous support of donors and sponsors. Explore the database at [professional.diabetes.org/researchDB\\_search.aspx](http://professional.diabetes.org/researchDB_search.aspx).

### DIABETES CORE UPDATE PODCASTS

*Diabetes Core Update* is a monthly audio podcast devoted to presenting and discussing the latest clinically relevant articles from the American Diabetes Association's scholarly journals. *Diabetes Core Update* audio podcasts are free and can be accessed through iTunes or RSS feed. For more information, please visit [diabetesjournals.org/site/podcasts.xhtml](http://diabetesjournals.org/site/podcasts.xhtml).

### IMAGES WANTED FOR THE COVER OF *DIABETES*

Readers are invited to submit images for use on the cover of *Diabetes*. Black-and-white or color photographic or photomicrographic images are preferable. Cover image submission and selection is completely independent of article submission and the peer-review process. Cover image submissions should be sent to [productionmanager@diabetes.org](mailto:productionmanager@diabetes.org) with a brief caption and complete credit information. For more information, please visit [diabetes.diabetesjournals.org/site/misc/coversubmission.pdf](http://diabetes.diabetesjournals.org/site/misc/coversubmission.pdf).

**Diabetes Care** (print ISSN 0149-5992, online ISSN 1935-5548) is owned, controlled, and published monthly by the American Diabetes Association, Inc., 1701 North Beauregard St., Alexandria, VA 22311. *Diabetes Care* is a registered trademark of the American Diabetes Association. **Periodicals postage** paid at Alexandria, VA, and additional mailing offices. **POSTMASTER:** Send address changes to *Diabetes Care*, American Diabetes Association, Inc., Journal Subscriptions, 1701 North Beauregard St., Alexandria, VA 22311. Claims for missing issues should be made within 6 months of publication. The publisher expects to supply missing issues free of charge only when losses have been sustained in transit and when the reserve stock permits.
